# Supplementary material for: A molecular timescale of eukaryote evolution and the rise of complex multicellular life
Source: Springer Nature journal article supplement (doi:10.1186/1471-2148-4-2), 2004-01-28
Supplement: Additional file 2 [file 1471-2148-4-2-s2.doc]

**Supplemental Table 2.** Proteins used in the analyses, arranged in alphabetical order in three columns and grouped by the comparison (node analyzed). The sequence data alignments for each protein can be found at:

**http://www.evogenomics.org/Publications/data/Complexity/**

| Vertebrate-Arthropod Analyses | | |
| --- | --- | --- |
| 17BetaHydroxysteroid Dehydrogenase 4 | Eukaryotic Initiation Factor 5A | Prolyl-4-Hydroxylase alpha |
| 2-Oxoisovalerate Dehydrogenase alpha | F-Actin Capping Protein alpha1 subunit | Protein Disulfide Isomerase (beta) |
| 2-Oxoisovalerate Dehydrogenase beta | Ferrochelatase | Protein Kinase C Inhibitor |
| 3-Hydroxyacyl-CoA Dehydrogenase | FK506-binding protein 12 kD | PurH - bifunctional purine synthesis |
| 40SS30-Ubiquitin fusion protein | FLAP1/ RAD2 | Pyruvate Dehydrogenase E1 alpha 1 |
| 60S Ribosomal L10 | Flightless I | Pyruvate Dehydrogenase Kinase 3 |
| 60S Ribosomal L13 | Fructose-1,6-bisphosphatase | Pyruvate Kinase |
| 60S Ribosomal L14 | Fructose-1,6-bisphosphate Aldolase C | Rab GDP Disassociation Inhibitor beta |
| 60S Ribosomal L5 | Fumarase | RAD 54 |
| 60S Ribosomal P0 | Furin | RAD 51 |
| 6-Phosphofructo-2-Kinase | GDP Disassociation Inhibitor (GDI) | Replication Factor C Large Subunit |
| AcetylCoA Acyltransferase 2 | Glucose Transporter 1 | Replication Factor C2/Activator 1 |
| Acetyl-CoA Carboxylase | Glucose-Regulated Protein 78kD (HSP70) | Replication Factor C4 |
| Aconitase | Glutamate Decarboxylase 67 kD | RING3 |
| Adenosine Deaminase | Glutamate Dehydrogenase | S-Adenosylhomocysteine Hydrolase |
| Adenylate Kinase 1 | Glutamine Synthetase | SSRP1 |
| Adenylosuccinate Lyase | Glyceraldehyde-3-Phosphate Dehydrogenase | Steroid Dehydrogenase |
| AIR carboxylase/SAICAR synthetase | Glycine Cleavage System H Protein | Sterol Carrier 2/X |
| Aldehyde Dehydrogenase | Glycine Dehydrogenase | Succinate Dehydrogenase Flavoprotein A |
| Alpha Actinin1 | GTP Cyclohydrolase I | Succinate Dehydrogenase IP subunit |
| Alpha Enolase | Heat Shock Protein 90kD alpha | Succinyl-CoA Synthetase alpha |
| alpha N-Acetylgalactosamindase | Hippocalcin | Succinyl-CoA Synthetase beta (GTP) |
| Alpha Spectrin | Histone Deacetylase 1 | Sulfite Oxidase |
| Aminomethyltransferase (Gly Cleav. T) | HMG-CoA Lyase | Synaptotagmin 1 |
| Aminophosphoribosyltransferase | HMG-CoA Synthase | T Complex 1 Alpha |
| Aspartate Aminotransferase 2 | Integrin-linked Kinase | T Complex 1 Epsilon |
| ATP Synthase alpha subunit | Inwardly-Rectifying K Channel | T Complex 1 Delta |
| Bleomycin Hydrolase | Isocitrate Dehydrogenase 3 beta | Target of myb 1 |
| Calbindin 2 | Lactose Dehydrogenase B | Threonyl-tRNA Synthetase |
| CAP binding protein 20kD | Laminin Beta | Transcription Activator 100kD |
| Cathepsin B | LIM Interacting Factor | Transcription Initiation Factor 3 beta |
| Cathepsin D | Lysyl Hydrolase | Transcription Initiation Factor 3 subunit 8 |
| Ca-Transporting ATPase - SERCA | Lysyl-tRNA Synthetase | Triose Phosphate Isomerase 1 |
| CDC 37 | MCM3 | Tryptophan 5-Monooxygenase/Hydroxylase |
| Citrate Synthase | MCM6 | Tubby (obesity-associated protein) |
| Clathrin Heavy Chain | Microfibrillar Associated Protein 1 | Tumor Necrosis type 1 receptor |
| Cyclin Dependant Kinase 1 | Microsomal Signal Peptidase 23 kD | Tumor Rejection gp96 / Endoplasmin |
| Cyclophilin B | Microtubule Assoc Protein EB1 | Ubiquitin C Terminal Hydrolase |
| DEAD RNA Helicase p68 | Na/K ATPase alpha 3 | Ubiquitin fusion-degradation 1-like |
| Defender against cell death (DAD) 1 | Na/K Transporting ATPase alpha1 | Ubiquitin Protein Ligase |
| Deoxyhypusine Synthase | Na-Ca-K Exchanger 2 | UDP-Glucose Pyrophosphorylase 2 |
| Dihydrolipoamide Dehydrogenase | NADP-dependant Malic Enzyme | UMP-CMP Kinase |
| Dihydrolipoamide Transacylase E2 | Nramp 1 | Unknown Conserved Protein |
| Dihydrofolate Reductase | Nucleoside diPhosphate Kinase (B) | Vacuolar ATPase alpha1 subunit |
| DNA Polymerase Gamma 1 | Oligosaccharyltransferase (DDOST48) | Vacuolar ATPase beta subunit |
| DNA Topoisomerase I | Palmitoyl protein Thioesterase 1 | Vigilin |
| DNA Topoisomerase II alpha | PEP Carboxykinase | Voltage-dependant anion channel 2 |
| EAG-related K Channel | Phosphoglycerate Kinase | Voltage-gated Ca Channel L alpha1D |
| Elongation Factor 2 | Polo-like Kinase | WD Repeat protein 1 (actin-interacting) |
| Elongation Factor G | Presenilin 1 | Xanthine Dehydrogenase |
| Endoplasmin/GRP96 | Proliferation cellular nuclear anitgen | Xeroderma pigmentosum group A |

| Animal-Fungi-Plant analyses | | |
| --- | --- | --- |
| 26S Proteasome nonATPase PAD1 | DNA Polymerase III/delta | PRP1 splicing factor |
| 26S Proteasome Regulatory subunit 4 | DNA Topoisomerase I | PRP8 splicing factor |
| 2-Oxoglutarate Dehydrogenase E1 | DNA Topoisomerase II | Pyruvate Dehydrogenase E1 alpha |
| 40S S11 | DNA Topoisomerase III alpha | Pyruvate Dehydrogenase E1 beta |
| 40S S13 | DNA-directed RNA Polymerase II sub2 | Pyruvate Kinase |
| 40S S15A | Dolichyl-phosphate mannose synthase | RAD51 |
| 40S S17 | Elongation Factor 1 alpha | RAD54 |
| 40S S19 | Elongation Factor 2 | RAN |
| 40S S2 | Elongation Factor G | Replication Factor C, Activator 1 |
| 40S S23 | Enolase | Ribonucleoside diPhosphate Reductase small/M2 |
| 40S S3A | Eukaryotic Release Factor 1 | RNA Helicase/DEAD |
| 40S S4 | Exportin 1/CRM1 | RNA Polymerase II largest subunit |
| 40S S5 | Fatty Acid Desaturase | RNA Polymerase II subunit 3 (33kD) |
| 40S S6 | Fatty Acyl-CoA Synthetase 3 | RRP4 (rRNA processing protein) |
| 40S S8 | Fibrillarin | RRP41 (rRNA processing protein) |
| 40S S9 | FLAP 1 Endonuclease | Saccharopine Dehydrogenase |
| 60S L10(QM) | Fructose-1,6-bisphosphatase | SCO1/Cyt oxidase def. Homolog1 |
| 60S L10A | Fumarase | Ser/Thr Protein Phosphatase 2A alpha |
| 60S L11 | G3PDH | Seryl-tRNA Synthetase |
| 60S L12 | GDP Disassociation Inhibitor | Signal Recognition Particle 54kD |
| 60S L13 | GDP-Mannose Pyrophosphorylase | Signal Recognition Particle Receptor Alpha |
| 60S L18 | GLCNAC-1-P Transferase | SNF2/Brahma |
| 60S L19 | Glucose Regulated Protein 78 kD | Sorbitol Dehydrogenase |
| 60S L23(L17) | Glucose-6-P 1-Dehydrogenase | Succinate Dehydrogenase Flavoprotein |
| 60S L3 | Glucose-6-P Isomerase | Succinate Dehydrogenase IP |
| 60S L32 | Glucosidase II alpha | T Complex 1 alpha |
| 60S L4(L1) | Glutamine Synthetase | T Complex 1 beta |
| 60S L5 | Glutaminyl-tRNA Synthetase | T Complex 1 delta |
| 60S L7 | Glycerol-3-Phosphate Dehydrogenase | T Complex 1 epsilon |
| 60S L8 | Glycine Cleavage System H Protein | T Complex 1 eta |
| 60S L9 | Glycine Dehydrogenase | T Complex 1 gamma |
| 60S P0 | Glycylpeptide N-TDTransferase | T Complex 1 theta |
| 6-Phosphofructo-2-Kinase | GPI8 Transamidase | T Complex 1 zeta |
| AcetylCoA Carboxylase | GTP Cyclohydrolase I | Target of Rapamycin |
| Actin-related protein 3 | Heat Shock Protein 90 | TCTP |
| Alanine Aminotransferase 2 | Histone Deacetylase 1 | Threonyl-tRNA Synthetase |
| Amidophosphoribosyltransferase | HMG-CoA Synthase | Transcription Factor 2 gamma |
| Aminomethyltransferase | Inorganic Pyrophosphotase | Transcription Factor TFIID |
| ARD1 subunit N-Acetyltransferase | Isocitrate Dehydrogenase NAD+ | Transcription Initiation Factor 2 beta |
| Arginine N-Methyltransferase 1 | Laminin-receptor/40S P40/SA | Transcription Initiation Factor 3 beta |
| Arsenite Transporter | Lysyl-tRNA Synthetase | Transcription Initiation Factor 4A |
| Aspartate Aminotransferase 2 | MAP Kinase 1 | Transcription Initiation Factor 5A |
| ATP Citrate Lyase | MCM2 | Transcritpion Initation Factor 2 alpha |
| Branched-chain A-keto acid Dehydrogenase E1 beta | MCM3 | Transportin |
| Ca+/Calmodulin Dependant Kinase | MCM4/CDC21 | Trans-PrenylTransferase |
| Casein Kinase II alpha | MCM6 | Triose Phosphate Isomerase |
| Cathepsin D | MCM7/CDC47 | Tryptophan-tRNA Synthetase |
| CDC2/CDK1 | Methionine Aminopeptidase 2 | U2 snRNA Factor |
| CDC23-like/Anaphase promoting 8 | N-Acetyltransferase | Ubiquitin-Activating Enzyme E1 |
| Citrate Synthase (mt) | N-ethylmaleimide sensitive fusion protein | UDP-glucose Dehydrogenase |
| Clathrin Heavy Chain | Nucleolar GTP-binding protein | Vacuolar ATPase alpha subunit |
| Cleavage/PolyA Specificity 73kD | Ornithine Aminotransferase | Vacuolar ATPase beta subunit |
| Coatomer Complex Beta | Phenylalanine tRNA Synthetase | Vacuolar ATPase Proteolipid (16kD) |
| Coatomer Complex Beta Prime | Phosphoglycerate Kinase | Vacuolar ATPase Proteolipid (21kD) |
| CTP Synthase | Phosphotidylinositol Synthase | Vacuolar ATPase subunit C |
| CTP:Phosphocholine Cytidylyltransferase | Pleiotropic Regulator 1 | Vacuolar ATPase subunit D |
| Deoxyhypusine Synthase | Prenyl cysteine carboxyl Methyltransferase | Vacuolar ATPase subunit E |
| Dihydrolipoamide Dehydrogenase | Prohibitin | Valyl-tRNA Synthetase |
| Dihydrolipoamide Succinyltransferase | Proliferation Assoc. protein1/2G4 | Vasolin-containing protein/CDC48 |
| DIS3 Mitotic Control Protein | Proliferation Cellular nuclear anitgen | WD40 Repeat Protein |
| DMC1 | Proline Oxidase (mt) | Xeroderma Pigmentosum Beta |
| DNA Ligase 1 | Proteasome Alpha type 4 | YME1-like Metalloprotease |
| DNA mismatch repair MLH1 | Proteasome Alpha type 7 |  |

| Cnidarian Analyses | | |
| --- | --- | --- |
| 40S S5 | DMC1 | Nitric Oxide Synthase |
| 40S SA/Laminin binding receptor | Electron Transfer Flavoprotein Beta | Nucleoside diphosphate Kinase |
| 60S L12 | Enolase | Phospholipase C Beta |
| 60S L17 | G3PDH | Protein Kinase C |
| 60S L18A | Glycogen Synthase Kinase 3 beta | RAS1-like |
| 60S L9 | Histone H2B | Succinate Dehydrogenase IP |
| Beta Catenin | HSP 90 | Talin |
| CAP/Adenyly cyclase associated protein | Na/K ATPase alpha 3 subunit | Voltage-gated Ca Channel alpha1D |
| cGMP Dependant Kinase 1 beta | NADPH Cytochrome p450 Reductase |  |

| **Poriferan Analyses** | | |
| --- | --- | --- |
| Enolase | Gnt-binding protein beta-5 | Signal Recognition Factor 54kD |
| Ca+/Calmodulin Dependant Kinase II | Leukotriene B4 12Hydroxydehydrogenase | STE20-like protein |
| Cathepsin L | PAD1 | TFIID |
| CDK1/CDC2 | Phenylalanine Hydroxylase | Triosephosphate Isomerase |
| Elongation Factor 1 alpha | Phospholipase C Beta | Vacuolar ATPase subunit D |
| Fructose bisphosphate Aldolase C | Phospholipase C Gamma | Xeroderma Pigmentosum B |
| G(q) protein alpha | Protein Kinase C |  |
| GDP Disassociation Inhibitor | Pyruvate Kinase (3) |  |

| Alveolate Analyses | | |
| --- | --- | --- |
| 40S Ribosomal S11 | DNA Polymerase I alpha | MCM 5 |
| 40S S12 | DNA Topoisomerase I | Methionine Aminopeptidase |
| 40S S17 | DNA Topoisomerase II | MHC-II-antigen |
| 40S S23 | DNA-dependant RNA Polymerase II | N-acetylglucosamine-1-phosphate Transferase |
| 40S S3A | DNA-directed RNA Polymerase I Large subunit | N-ethlymaleimide-sensitive factor |
| 40S S4 | DNA-directed RNA Polymerase II_3 | Nifs-like Aminotransferase |
| 60S L11 | Elongation Factor 1 alpha | Ornithine Aminotransferase |
| 60S L21 | Elongation Factor 2 | Phosphatidylinositol Glycan (PIGA) |
| 60S L3 | Eukaryotic Initiation Factor 5A | Prenyl Transferase |
| 60S L4 | Eukaryotic Release Factor 1 | Proteasome C8 |
| 60S L7 | Eukaryotic Release Factor 3 | RAD3-like DNA Helicase |
| 60S L9 | Fatty-Acyl CoA Synthase | Ribonucleotide Reductase large |
| 60S P0 | Fibrillarin | Ribonucleotide Reductase small |
| Acetyl-CoA Carboxylase | FLAP endonuclease | Succinate Dehydrogenase IP |
| Adenylosuccinate synthetase | Fructose-1,6-bisphosphatase | T Complex 1 alpha |
| Enolase | Glycerol-3-Phosphate Dehydrogenase | T Complex 1 beta |
| Aspartate Aminotransferase | GTP Cyclohydrolase I | T Complex 1 epsilon |
| Aspartate Transcarbamoylase | HSP 60 | T Complex 1 eta |
| Ca+ ATPase | HSP 70 | T Complex 1 gamma |
| Citrate Synthase | HSP 90 | TCTP |
| Cleavage/Poly-A Specificity | Inorganic Pyrophosphatase | TFIID |
| CTP Synthase | Inosine-5 Monophosphate Dehydrogenase | UMP-CMP Kinase |
| CTP:Phosphocholine Cytidyltransferase | Long-chain Fatty-acid CoA Ligase | Uracil Kinase |
| DEAD box RNA helicase | MCM 4 | Vacuolar ATP Synthase alpha |
| Dihydrolipoamide Dehydrogenase |  | Vacuolar ATP Synthase beta |
| DNA Ligase |  |  |

| Euglenozoan Analyses | | |
| --- | --- | --- |
| 20S Proteasome A1 | Ca+ ATPase | Laminin Receptor/40S S0 |
| 20S Proteasome A2 | Cbf5p Homolog | Mannose-1-Phosphate Guanyltransferase |
| 20S Proteasome A3 | CDC48 | MCM 4 |
| 20S Proteasome A4 | CDC47 | MSH2 |
| 20S Proteasome A5 | Chromosomal Maintainance 3 | N-Acetylglucosamine-1-Phosphate Transferase |
| 20S Proteasome A7 | CTP Synthase | N-Acetyltransferase ARD1 |
| 20S Proteasome B4 | Cystathionine Beta Lyase | N-Acetyltransferase NAT1 |
| 40S Ribosomal S11 | Dihydrolipomamide Succinyltransferase | N-Ethylmaleimide Sensitive Fusion Protein |
| 40S S13 | DNA Ligase | Nucleolar GTP Binding Protein |
| 40S S2 | DNA Mismatch repair MLH1 | Nucleolar-rRNA Processing Protein |
| 40S S23 | DNA Topoisomerase I | Nucleoside Diphosphate Kinase |
| 40S S3A | DNA Topoisomerase II | Oligosaccharyl Transferase STT3 |
| 40S S4 | DNA-directed RNA Polymerase I Large | Peroxisomal-targeting Signal Receptor 1 |
| 40S S6 | DNA-directed RNA Polymerase IIA | Proliferation-associated Protein 2G4 |
| 40S S9 | DNAJ/HSP40 homolog 4 | Proteasome ATPase subunit 3 |
| 5,10-Methylenetetrahydrofolate Dehydrogenase | Dyskerin | Proteasome Macropain subunit alpha2 |
| 60S L10 | Elongation Initation Factor 2A | Proteasome Regulatory ATPase subunit 1 |
| 60S L10A | Eukaryotic Initiation Factor 5A | Proteasome Regulatory ATPase subunit 5 |
| 60S L11 | Eukaryotic Release Factor 1 | Proteasome Regulatory ATPase subunit 6 |
| 60S L15 | Farnesy diphosphate Synthase | Pyruvate Dehydrogenase |
| 60S L23 | Fatty-acyl-CoA Synthetase 1 | Ribonucleoside-diphosphate Reductase Large |
| 60S L27A | Fatty-acyl-CoA Synthetase 2 | Ribonucleoside-diphosphate Reductase Small |
| 60S L3 | Fatty-acyl-CoA Synthetase 3 | RRP 41p |
| 60S L32 | Fatty-acyl-CoA Synthetase 4 | RRP 4p |
| 60S L4 | Feebly-like homolog | STI1-like Protein |
| 60S L7A | Fibrillarin | Succinate Dehydrogenase Flavoprotein |
| 60S L9 | Hit homolog | T Complex 1 zeta |
| 60S P0 | Histone Acetyltransferase | Tyrosyl-tRNA Synthetase |
| Alanine Transaminase | Histone Deacetylase hdo2 | Ubiqutin Activating Enzyme E1C |
| ALG-2 Interacting Protein AIP1 | HMG-CoA Reductase | Vacuolar ATPase subunit B |
| Antigen LmSTI1 | Inorganic Pyrophosphatase | Vacuolar ATPase subunit F |
| Arginine N-methyltransferase 1 | Inosine-5-Monophosphate Dehydrogenase | Valosin-containing protein |
| ATP-dependant RNA Helicase |  | Zuotin-related factor 2 |

| **Diplomonad (*Giardia*) Analyses** | | |
| --- | --- | --- |
| 20S Proteasome A1 | CTP Synthase | HSP 70 |
| 20S Proteasome A2 | Cysteine Sulfotransferase | Immunoglobin Heavy Chain Binding Protein |
| 20S Proteasome A3 | DNA Polymerase Alpha | Ornithine Carbomyltransferase |
| 20S Proteasome A4 | DNA-directed RNA Polymerase II Large | Phosphoribosyl Pyrosphosphate Synthatase |
| 20S Proteasome A5 | DNA-directed RNA Polymerase II_2 | Pyruvate Kinase |
| 26S Proteasomal ATPase 3-like | DNA-directed RNA Polymerase III | T Complex 1 alpha |
| 26S Proteasome Subunit 4 | DNAJ/HSP40 homolog 4 | T Complex 1 beta |
| 26S Proteasome Subunit beta 3 | Elongation Factor 1 alpha | T Complex 1 epsilon |
| 60S Ribosomal L35 | Elongation Factor 2 | T Complex 1 gamma |
| Asparate Aminotransferase | Enolase | T Complex 1 theta |
| ATP-dependant RNA helicase | Eukaryotic Release Factor 1 | T Complex 1 zeta |
| Beta Prime Adaptin | Eukaryotic Release Factor 3 | Translation Initiation Factor 2 gamma |
| Calcium-transporting ATPase | Fe-S Cluster Protein Nifu-like | Vacuolar ATPase Alpha |
| Cell Division Protein KRR1 | Fibrillarin | Vacuolar Sorting Protein 4 |
| Coatomer Complex Beta Prime | Glyceraldehyde-3-Phosphate Dehydrogenase | Valyl-tRNA Synthatase |

| Rhodophyta (Red Algae) Analyses | | |
| --- | --- | --- |
| 26S Proteosome Regulatory subunit 4 | 60SL23A | HSP 90 |
| 40SS10 | 60SL24 | Multiprotein Bridging Factor 1 |
| 40SS11 | 60SL26 | RNA Polymerase I 40kD |
| 40SS13 | 60SL27 | RNA Polymerase II Largest (RPB1) |
| 40SS15A | 60SL30 | S-Adenosylhomocysteine Hydrolase |
| 40SS16 | 60SL32 | Signal Peptidase Complex 18kD |
| 40SS20 | 60SL35A | Starch Branching Enzyme II |
| 40SS23 | 60SL7A | Succinate Dehydrogenase IP |
| 40SS25 | Actin | T Complex Zeta (6) |
| 40SS6 | Beta Tubulin | Translation Factor SUI1 |
| 40SS8 | Clathrin Heavy Chain | Translation Initiation Factor 1a |
| 40SS9 | DNA Topoisomerase II | Triose Phosphate Isomerase |
| 4-Hydroxyphenylpyruvate Dioxygenase | Elongation Factor 1 alpha | UDP-Glucose Pyrophosphorylase |
| 60SL10 | Elongation Factor 2 | Vacuolar ATPase 16kD proteolipid |
| 60SL10A | G3PDH | Vacuolar ATPase alpha |
| 60SL19 | Glutamine Synthase | Vacuolar ATPase beta |
| 60SL21 | Glutamyl-tRNA Ligase | Valosin-containing Protein |

| **Choanoflagellate (*Monosiga*) Analyses** | | |
| --- | --- | --- |
| Actin |  |  |
| Alpha Tubulin |  |  |
| Beta Tubulin |  |  |
| Elongation Factor 2 |  |  |
| HSP70 |  |  |
| RNA Polymerase II Large |  |  |
